# Supplementary material for: Honeycomb graphene–polyaniline nanocomposites as novel electrode materials for high-performance supercapacitors
Source: Royal Society of Chemistry journal article supplement (doi:10.1039/d3nj01332d), 2023-01-01
Supplement: d3nj01332d1.pdf [file d3nj01332d1.pdf]

## **Honeycomb graphene-polyaniline nanocomposites as novel electrode materials for high-performance supercapacitors**

Haiyang Fu<sup>1,2</sup>, Bo Gao<sup>1\*</sup>, Jiahao Li<sup>1</sup>, Zhuang Liu<sup>1</sup>, Qihao Yin<sup>1</sup>, Ali Reza Kamali<sup>2,3\*</sup>

1.Key Laboratory for Ecological Metallurgy of Multimetallic Mineral, Ministry of Education,

Northeastern University, Shenyang 110819, P.R.China

2.Energy and Environmental Materials Research Centre (E<sup>2</sup>MC), School of Metallurgy,

Northeastern University, Shenyang, 110819, China

3.Department of Materials Science and Metallurgy, University of Cambridge, 27 Charles

Babbage Road, Cambridge CB3 0FS

E-mail address: gaob@smm.neu.edu.cn (B. Gao); ali@smm.neu.edu.cn;

a,r.kamali@cantab.net (A.R. Kamali)

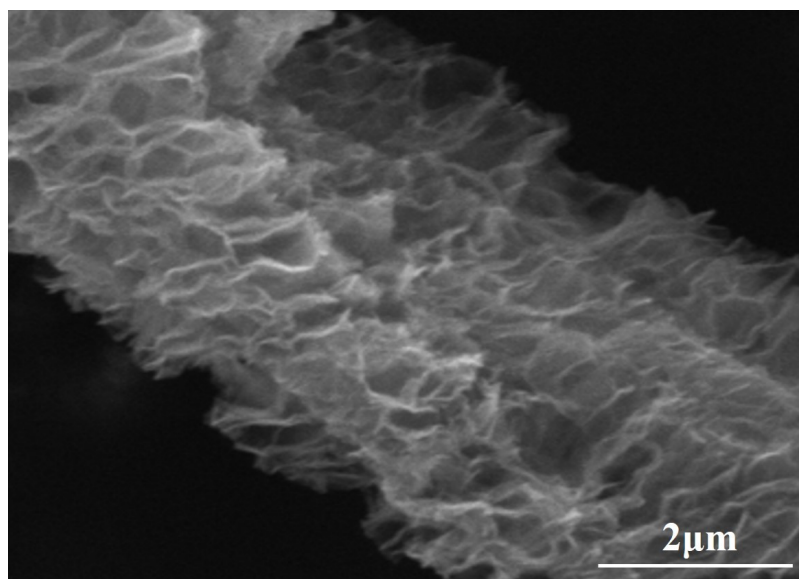

Fig. S1 FESEM micrograph of HG

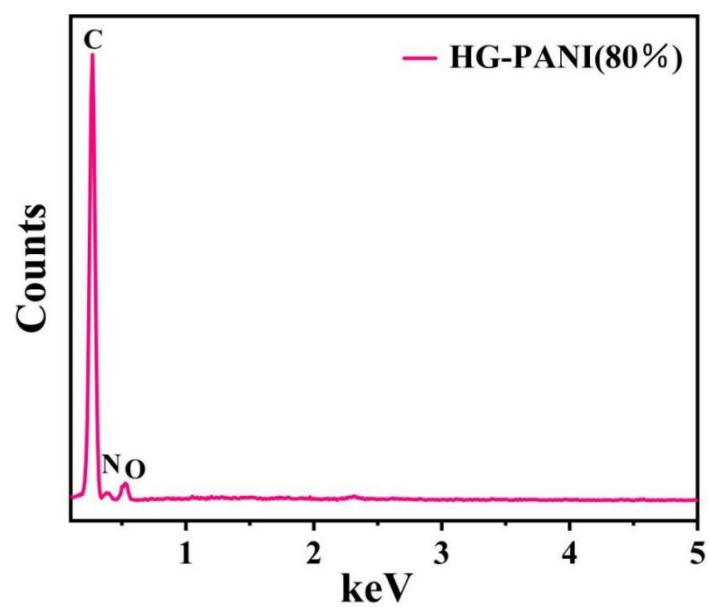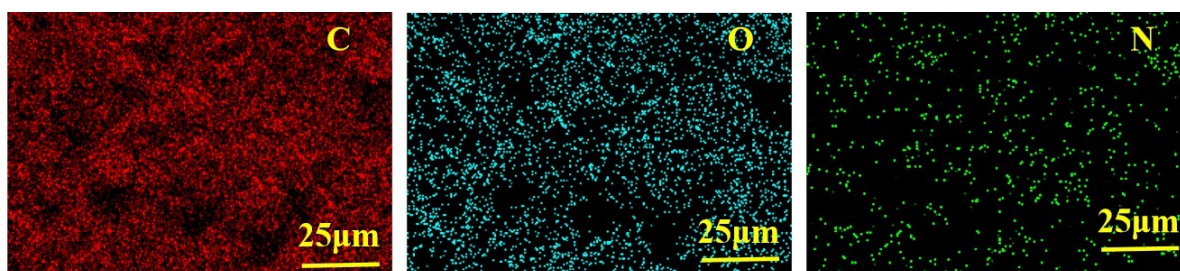

Fig.S2 EDS spectrum and EDS-mapping of HG-PANI (80%)

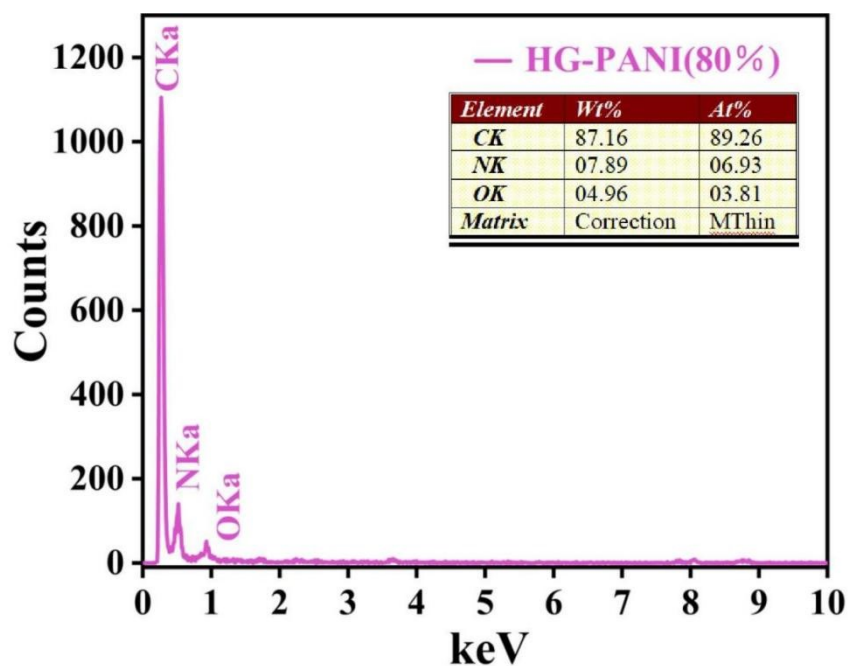

Fig.S3 Energy spectrum analysis of selected area in HG-PANI (80%)

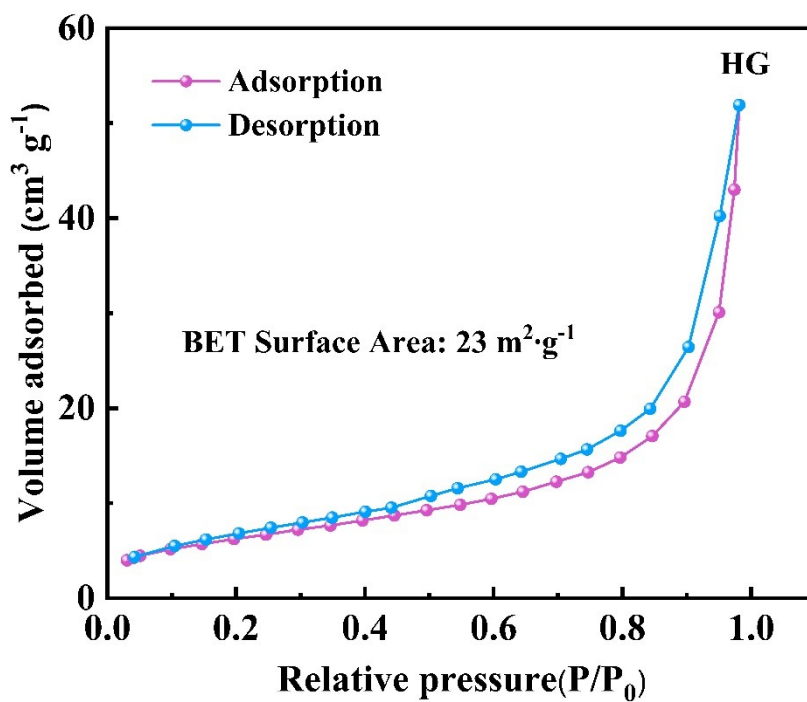

Fig. S4 N<sub>2</sub> adsorption/desorption isotherms of HG at 77K.

Table S1 The atomic percentage of C1s and O1s of HG-PANI (80%)

| Sample        | C 1s    | N 1s   | O 1s    |
|---------------|---------|--------|---------|
| HG-PANI (80%) | 80.31 % | 7.96 % | 11.74 % |

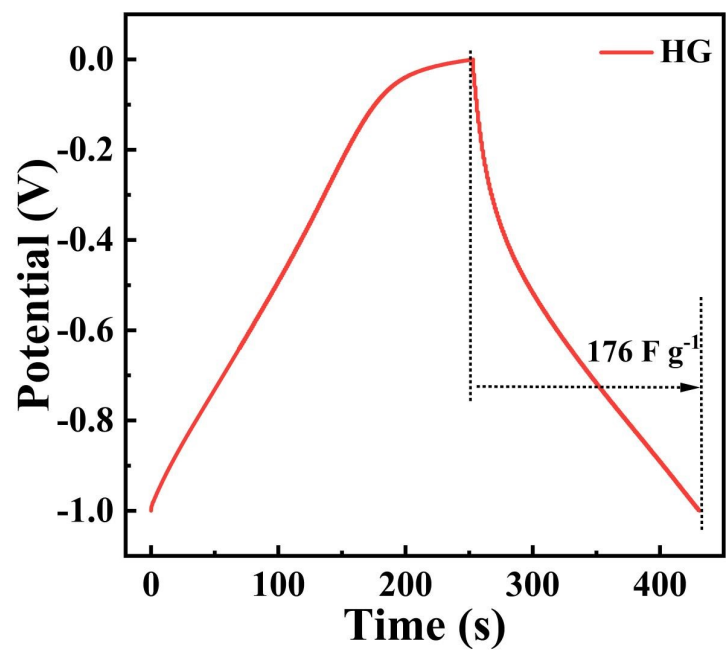

Fig. S5 GCD curves of HG at a current density of  $1 \text{ A}\cdot\text{g}^{-1}$
